# Supplementary material for: Prognostic and predictive value of endothelial dysfunction biomarkers in sepsis-associated acute kidney injury: risk-stratified analysis from a prospective observational cohort of pediatric septic shock
Source: PubMed Central journal article supplement (PMC10318688; doi:10.1186/s13054-023-04554-y), 2023-07-03

### Additional File 3.

General linear models for association between markers of endothelial dysfunction, D3 SA-AKI SCr and PERSEVERE-II strata.

| Biomarker       | Term                       | Coeff. (SE)   | P value |
|-----------------|----------------------------|---------------|---------|
| sTM (log10)     | D3 SA-AKI                  | 0.129 (0.03)  | <0.001  |
|                 | P-II Strata                |               |         |
|                 | High                       | 0.169 (0.06)  | 0.003   |
|                 | Intermediate               | 0.116 (0.04)  | 0.003   |
|                 | D3 SA-AKI X P-II Strata    |               |         |
|                 | D3 SA-AKI and High         | 0.064 (0.07)  | 0.402   |
|                 | D3 SA-AKI and Intermediate | -0.023 (0.06) | 0.698   |
| Angpt-1 (log10) | D3 SA-AKI                  | -0.118 (0.06) | 0.049   |
|                 | P-II Strata                |               |         |
|                 | High                       | -0.468 (0.11) | <0.001  |
|                 | Intermediate               | -0.003 (0.07) | 0.966   |
|                 | D3 SA-AKI X P-II Strata    |               |         |
|                 | D3 SA-AKI and High         | 0.066 (0.14)  | 0.646   |
|                 | D3 SA-AKI and Intermediate | -0.185 (0.11) | 0.106   |
| Angpt-2 (log10) | D3 SA-AKI                  | 0.204 (0.05)  | <0.001  |
|                 | P-II Strata                |               |         |
|                 | High                       | 0.375 (0.09)  | <0.001  |
|                 | Intermediate               | 0.285 (0.06)  | <0.001  |
|                 | D3 SA-AKI X P-II Strata    |               |         |
|                 | D3 SA-AKI and High         | -0.098 (0.13) | 0.441   |
|                 | D3 SA-AKI and Intermediate | -0.036 (0.10) | 0.721   |
| Tie-2 (log10)   | D3 SA-AKI                  | 0.054 (0.03)  | 0.089   |
|                 | P-II Strata                |               |         |
|                 | High                       | 0.086 (0.05)  | 0.117   |
|                 | Intermediate               | 0.013 (0.04)  | 0.730   |
|                 | D3 SA-AKI X P-II Strata    |               |         |
|                 | D3 SA-AKI and High         | -0.311 (0.07) | <0.001  |
|                 | D3 SA-AKI and Intermediate | -0.215 (0.06) | <0.001  |
| Angpt-2/Angpt-1 | D3 SA-AKI                  | 1.037 (0.52)  | 0.047   |
|                 | P-II Strata                |               |         |
|                 | High                       | 3.499 (0.92)  | <0.001  |
|                 | Intermediate               | 0.521 (0.63)  | 0.413   |
|                 | D3 SA-AKI X P-II Strata    |               |         |
|                 | D3 SA-AKI and High         | 1.090 (1.25)  | 0.383   |
|                 | D3 SA-AKI and Intermediate | 0.389 (0.99)  | 0.694   |
| Angpt-2/Tie-2   | D3 SA-AKI                  | 0.147 (0.12)  | 0.238   |
|                 | P-II Strata                |               |         |

|         |                            |               |       |
|---------|----------------------------|---------------|-------|
|         | High                       | 0.322 (0.22)  | 0.132 |
|         | Intermediate               | 0.463 (0.15)  | 0.002 |
|         | D3 SA-AKI X P-II Strata    |               |       |
|         | D3 SA-AKI and High         | 0.657 (0.30)  | 0.027 |
|         | D3 SA-AKI and Intermediate | 0.664 (0.23)  | 0.005 |
|         |                            |               |       |
| VCAM-1  | D3 SA-AKI                  | 0.08 (0.05)   | 0.070 |
|         | P-II Strata                |               |       |
|         | High                       | 0.257 (0.08)  | 0.002 |
|         | Intermediate               | 0.093 (0.05)  | 0.102 |
|         | D3 SA-AKI X P-II Strata    |               |       |
|         | D3 SA-AKI and High         | -0.072 (0.12) | 0.523 |
|         | D3 SA-AKI and Intermediate | 0.008 (0.08)  | 0.929 |
|         |                            |               |       |
| ICAM-1  | D3 SA-AKI                  | 0.116 (0.03)  | 0.001 |
|         | P-II Strata                |               |       |
|         | High                       | 0.202 (0.05)  | 0.001 |
|         | Intermediate               | 0.144 (0.04)  | 0.001 |
|         | D3 SA-AKI X P-II Strata    |               |       |
|         | D3 SA-AKI and High         | -0.04 (0.08)  | 0.622 |
|         | D3 SA-AKI and Intermediate | -0.09 (0.06)  | 0.129 |
|         |                            |               |       |
| PECAM-1 | D3 SA-AKI                  | 0.013 (0.06)  | 0.701 |
|         | P-II Strata                |               |       |
|         | High                       | 0.009 (0.06)  | 0.874 |
|         | Intermediate               | 0.086 (0.04)  | 0.043 |
|         | D3 SA-AKI X P-II Strata    |               |       |
|         | D3 SA-AKI and High         | 0.017 (0.08)  | 0.838 |
|         | D3 SA-AKI and Intermediate | -0.06 (0.06)  | 0.292 |

**sTM**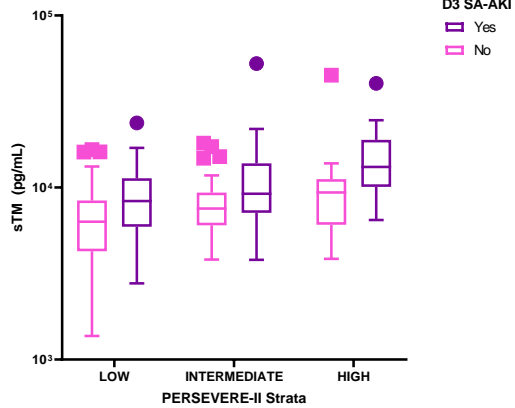**Angpt-1**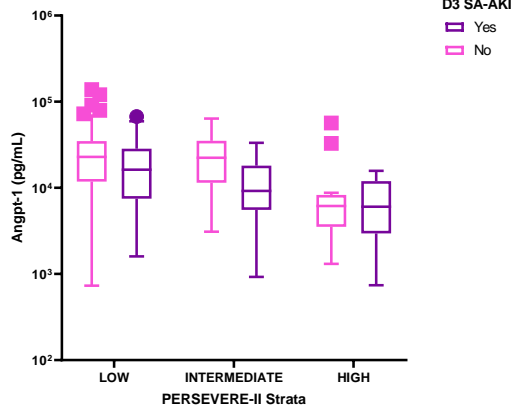**Angpt-2**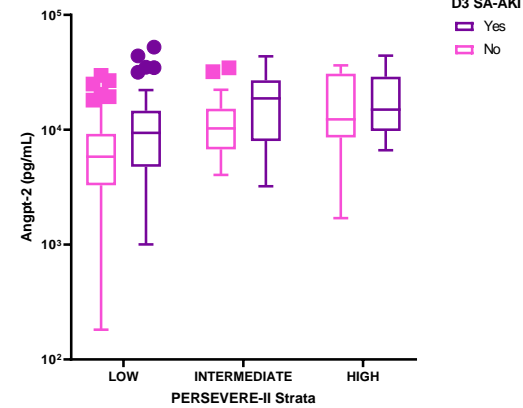**Angpt-2/Angpt-1**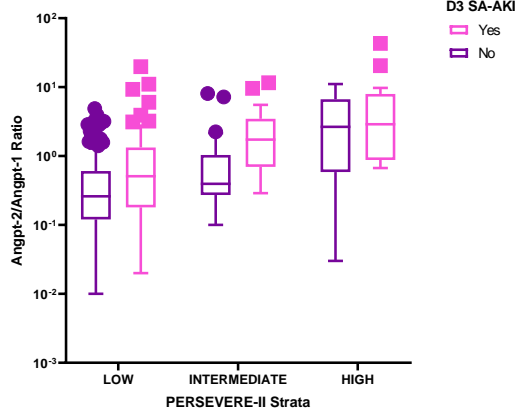**Tie-2 \***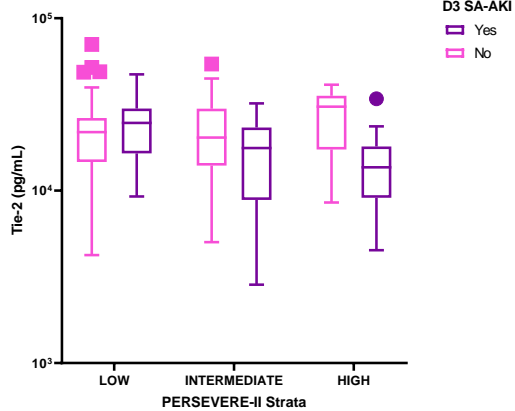**Angpt-2/Tie-2 \***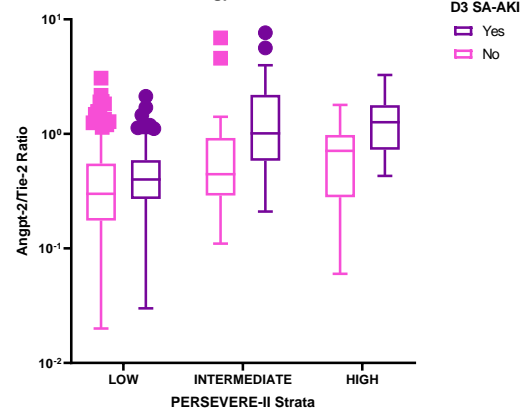**ICAM-1**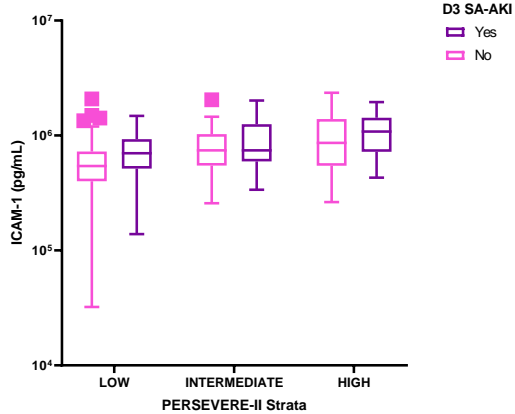**VCAM-1**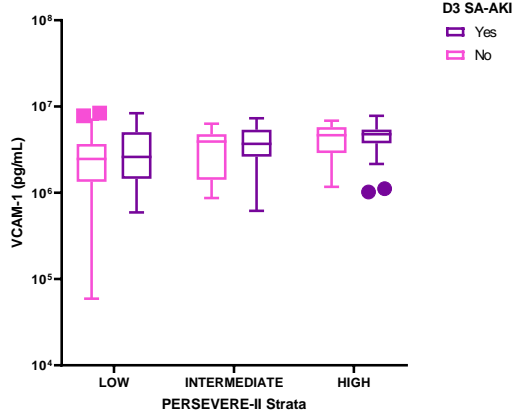**PECAM-1**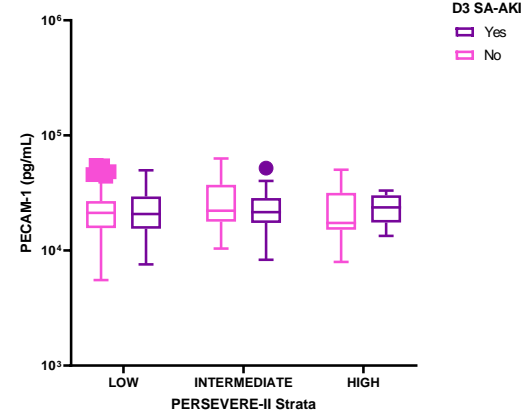

Supplement: 13054_2023_4554_MOESM3_ESM.pdf [file 13054_2023_4554_MOESM3_ESM.pdf]
