# Supplementary material for: Prognostic and predictive value of endothelial dysfunction biomarkers in sepsis-associated acute kidney injury: risk-stratified analysis from a prospective observational cohort of pediatric septic shock
Source: PubMed Central journal article supplement (PMC10318688; doi:10.1186/s13054-023-04554-y), 2023-07-03
Supplement: 13054_2023_4554_MOESM1_ESM.pdf [file 13054_2023_4554_MOESM1_ESM.pdf]

## Additional File 1.

Clinical characteristics of patients according to PERSEVERE-II mortality class

| N=301              | High risk<br>(n=36)     | Intermediate risk<br>(n=63) | Low risk<br>(n=202)  | P value |
|--------------------|-------------------------|-----------------------------|----------------------|---------|
| Age (years)        | 2.4 (1.1, 5.2)          | 3.2 (0.7, 7.3)              | 3.3 (1.2, 6.8)       | 0.977   |
| PRISM-III          | 22 (16, 28) *           | 14 (10, 18) *               | 10 (5, 14)           | <0.001  |
| P-II Mort. Prob    | 0.398 (0.391, 0.407) ** | 0.187 (0.181, 0.193) *      | 0.009 (0.005, 0.012) | <0.001  |
| 28-day mortality   | 11 (30.6 %) **          | 9 (14.3 %) *                | 3 (1.5 %)            | <0.001  |
| Complicated course | 23 (63.9 %) **          | 30 (47.6 %) *               | 60 (29.7 %)          | <0.001  |
| D1 SA-AKI          | 25 (69.4 %) **          | 37 (58.7 %) *               | 64 (31.8 %)          | <0.001  |
| D3 SA-AKI          | 21 (58.3 %) **          | 29 (46.1 %) *               | 56 (27.7 %)          | <0.001  |
| D7 SA-AKI          | 19 (52.8 %) **          | 22 (34.9 %) *               | 45 (22.3 %)          | <0.001  |
| Day 1 RRT          | 9 (25.0 %) **           | 6 (9.5 %) *                 | 4 (2.0 %)            | <0.001  |
| Day 3 RRT          | 13 (36.1 %) **          | 9 (14.3 %) *                | 7 (3.5 %)            | <0.001  |
| Day 7 RRT          | 17 (47.2 %) **          | 11 (17.5 %) *               | 9 (4.5%)             | <0.001  |

\*\*Indicates significant difference relative to intermediate- and low-risk strata after adjusting for multiple comparisons.

\*Indicates significant difference relative to low-risk strata alone after adjusting for multiple comparisons.
