# Supplementary material for: Prognostic and predictive value of endothelial dysfunction biomarkers in sepsis-associated acute kidney injury: risk-stratified analysis from a prospective observational cohort of pediatric septic shock
Source: PubMed Central journal article supplement (PMC10318688; doi:10.1186/s13054-023-04554-y), 2023-07-03
Supplement: 13054_2023_4554_MOESM2_ESM.pdf [file 13054_2023_4554_MOESM2_ESM.pdf]

**Additional File 2.**

Univariate associations between predictor variables and risk of D3 SA-AKI SCr

| Variable                       | OR                 | P value |
|--------------------------------|--------------------|---------|
| Age                            | 0.94 (0.90, 0.99)  | 0.019   |
| Sex (Female)                   | 0.8 (0.5, 1.2)     | 0.274   |
| PRISM-III                      | 1.04 (1.01, 1.06)  | 0.001   |
| P-II Mortality Probability X10 | 1.4 (1.12, 1.7)    | <0.001  |
|                                |                    |         |
| sTM (Log10)                    | 56.4 (18.4, 173.2) | <0.001  |
| Angpt-1 (Log10)                | 0.4 (0.2, 0.6)     | <0.001  |
| Angpt-2 (Log10)                | 7.4 (3.7, 14.3)    | <0.001  |
| Tie-2 (Log10)                  | 0.2 (0.1, 0.6)     | 0.003   |
| Angpt-2/Angpt-1                | 1.07 (1.01, 1.14)  | 0.015   |
| Angpt-2/Tie-2                  | 2.6 (1.8, 3.7)     | <0.001  |
| VCAM-1 (Log10)                 | 3.9 (2.0, 7.9)     | <0.001  |
| ICAM-1 (Log10)                 | 14.7 (4.8, 43.7)   | <0.001  |
| PECAM-1 (Log10)                | 1.6 (0.6, 4.1)     | 0.343   |
