# Supplementary material for: Prognostic and predictive value of endothelial dysfunction biomarkers in sepsis-associated acute kidney injury: risk-stratified analysis from a prospective observational cohort of pediatric septic shock
Source: PubMed Central journal article supplement (PMC10318688; doi:10.1186/s13054-023-04554-y), 2023-07-03
Supplement: 13054_2023_4554_MOESM4_ESM.pdf [file 13054_2023_4554_MOESM4_ESM.pdf]

**Additional File 4.**

a.

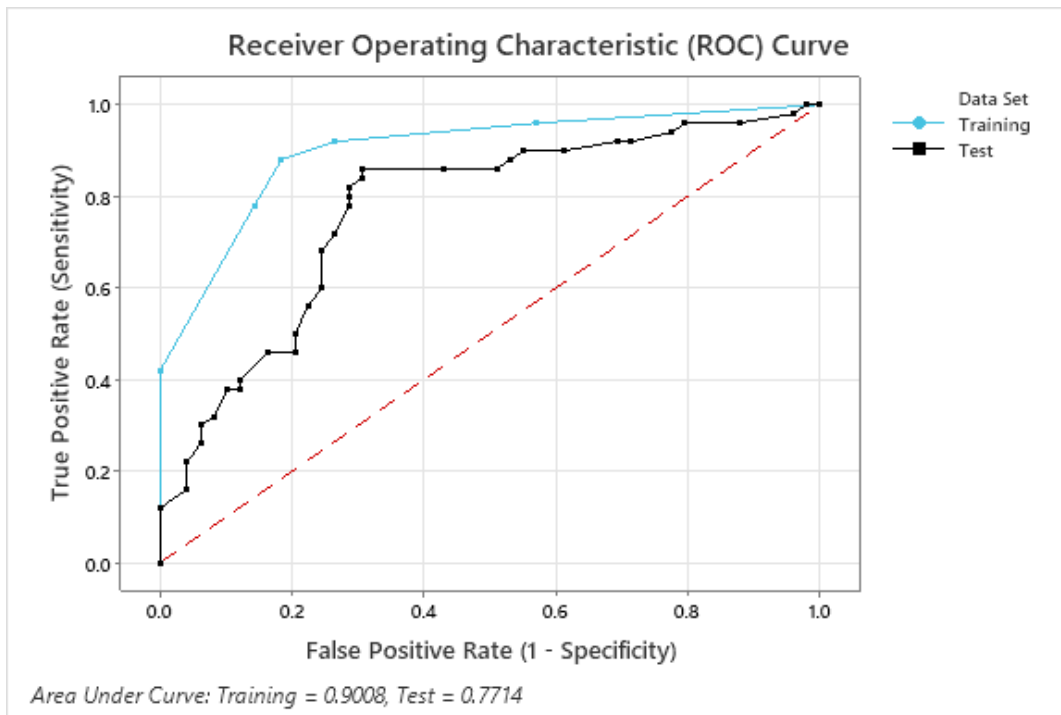

b.

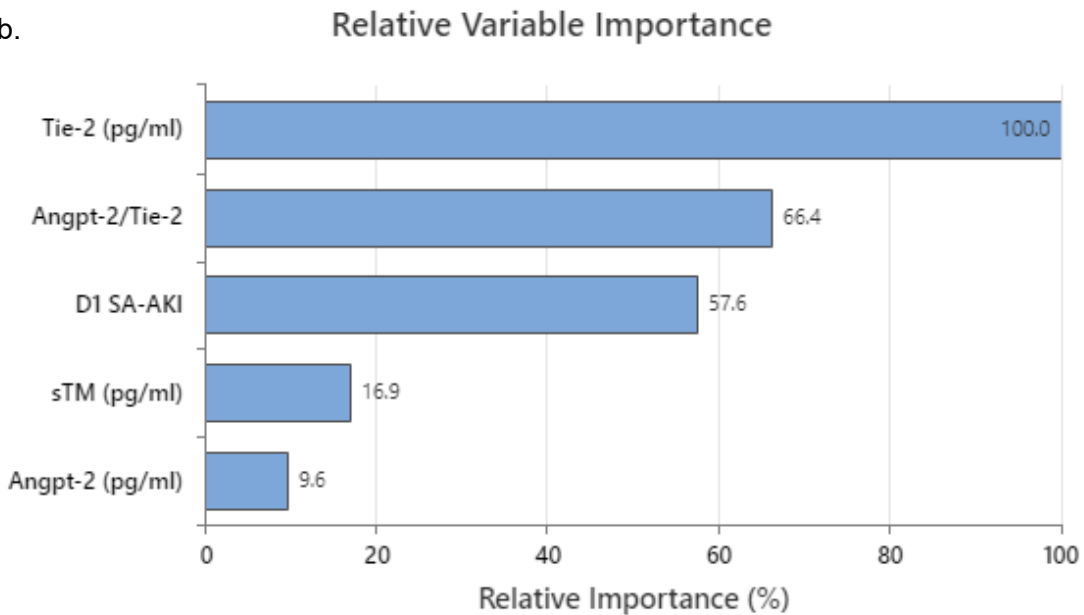

*Variable importance measures model improvement when splits are made on a predictor. Relative importance is defined as % improvement with respect to the top predictor.*
