# Supplementary material for: Prognostic and predictive value of endothelial dysfunction biomarkers in sepsis-associated acute kidney injury: risk-stratified analysis from a prospective observational cohort of pediatric septic shock
Source: PubMed Central journal article supplement (PMC10318688; doi:10.1186/s13054-023-04554-y), 2023-07-03
Supplement: 13054_2023_4554_MOESM5_ESM.pdf [file 13054_2023_4554_MOESM5_ESM.pdf]

**Additional File 5.**

**Figure 1.**

Classification of patients with high- and intermediate- PERSEVERE-II mortality risk in the validation cohort (n=84) according to the PERSEVERence SA-AKI Risk model without any modifications.

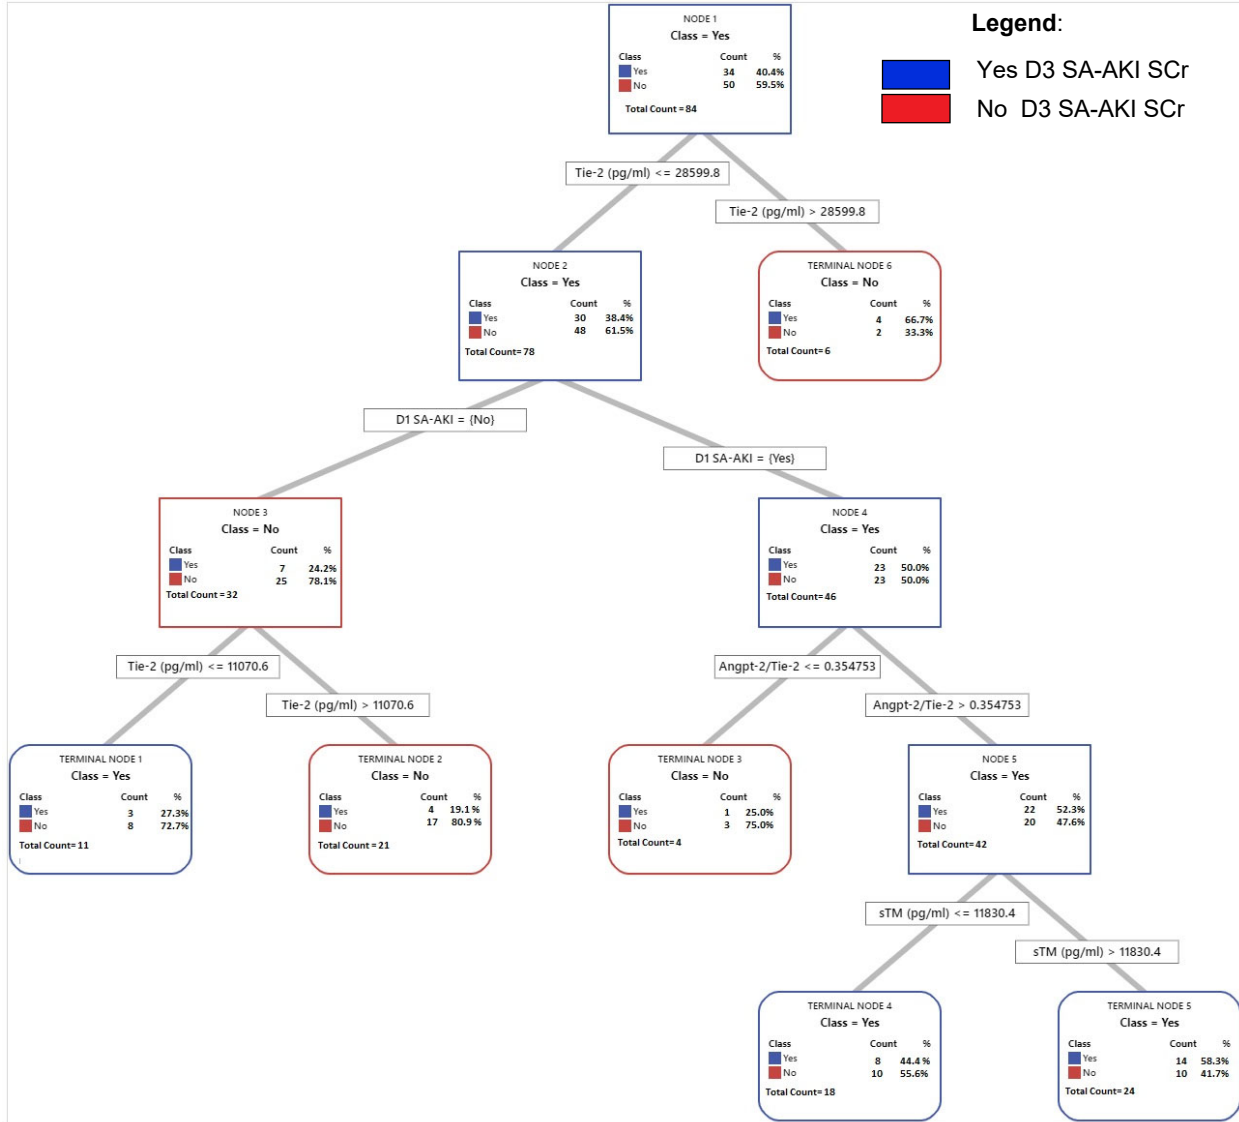

**Table. 1**

Demographic characteristics and clinical outcomes among patients categorized as high- vs. low D3 SA-AKI risk in the combined derivation and validation cohorts among those categorized as having high- or intermediate- PERSEVERE-II mortality risk.

| Variable               | High D3 SA-AKI risk<br>(n=105) | Low D3 SA-AKI risk<br>(n=78) | p value |
|------------------------|--------------------------------|------------------------------|---------|
| Age (Years)            | 4 (1, 9)                       | 4 (1, 9)                     | 0.724   |
| Sex, Female (%)        | 51 (48.5%)                     | 29 (37.2%)                   | 0.193   |
| Race (Self-identified) |                                |                              | 0.640   |
| White/Caucasian        | 77 (73%)                       | 57 (73%)                     |         |
| Black/African American | 13 (13%)                       | 6 (8%)                       |         |
| Other                  | 14 (13%)                       | 11 (14%)                     |         |
| Ethnicity              |                                |                              | 0.114   |
| Hispanic or Latino     | 11 (11%)                       | 14 (11%)                     |         |
| PRISM-III              | 16 (10, 24)                    | 12 (8, 19)                   | 0.030   |
| 28-day Mortality       | 28 (26.7%)                     | 11 (14.1%)                   | 0.055   |
| Complicated course     | 66 (62.8%)                     | 26 (33.3%)                   | <0.001  |
| PICU LOS               | 8 (4, 15)                      | 7 (3, 15)                    | 0.085   |
| PICU Free Days         | 20 (13, 24)                    | 21 (13, 25)                  | 0.086   |
| D3 SA-AKI              | 68 (64.7%)                     | 15 (19.2%)                   | <0.001  |
| Day 7 CRRT*            | 25 (33.3%)                     | 2 (4.6%)                     | <0.001  |

\*Adjusted for study mortality before day 7 and those patients transferred out of ICU without persistent SA-AKI.
